# Supplementary material for: Association between the use of balanced fluids and outcomes in critically ill children: a before and after study
Source: Springer Nature journal article supplement (doi:10.1186/s13054-021-03705-3), 2021-07-29
Supplement: MOESM1 [file 19403106]

## Supplementary Tables and Figures

### Table of Contents:

Supplementary Table 1: Cumulative Fluid Administered Dichotomized by time-periods: page 2

Supplementary Table 2: Daily Stages of AKI by Time Period: page 3

Supplementary Table 3: Daily Severe AKI by Time Period: page 4

Supplementary Table 4: Clinical Outcomes Stratified by Chloride Content of Resuscitation and Maintenance: pages 5-6

Supplementary Table 5: Electrolyte profiles and abnormalities in the first 7 days after admission: page 7-8

Supplementary Figure 1: Daily Chloride for first 7 days: page 9

Supplementary Figure 2: Daily Sodium for first 7 days: page 10

Supplementary Figure 3: Daily Potassium for first 7 days: page 11

Supplementary Figure 4: Daily Bicarbonate for first 7 days: page 12

Supplementary Figure 5: Interrupted Time Series Day 3 AKI: page 13

Supplementary Figure 6: Interrupted Time Series Mortality: page 14

**Supplementary Table 1: Cumulative Fluid Administered in First 3 Days Dichotomized by time-periods**

| Fluid Type (mL/kg) |               | Pre-Intervention  | Post-Intervention | p value |
|--------------------|---------------|-------------------|-------------------|---------|
| Resuscitation      | mean $\pm$ SD | 5 $\pm$ 18        | 6 $\pm$ 14        | <0.0001 |
|                    | median (IQR)  | 0 (0-0)           | 0 (0-0)           |         |
| Maintenance        | mean $\pm$ SD | 114 $\pm$ 89      | 112 $\pm$ 84      | 0.84    |
|                    | median (IQR)  | 99.3 (44.8-171.7) | 98.2 (47.3-163.7) |         |
| Blood Products     | mean $\pm$ SD | 2 $\pm$ 42        | 1 $\pm$ 7         | 0.4     |
|                    | median (IQR)  | 0 (0-0)           | 0 (0-0)           |         |
| Fluid Creep        | mean $\pm$ SD | 7 $\pm$ 13        | 11 $\pm$ 20       | <0.0001 |
|                    | median (IQR)  | 0.6 (0-7.4)       | 1.4 (0-14)        |         |
| Nutrition          | mean $\pm$ SD | 98 $\pm$ 92       | 103 $\pm$ 95      | 0.25    |
|                    | median (IQR)  | 69.9 (25.7-148.8) | 73.6 (24.6-159.8) |         |
| RRT Volume         | mean $\pm$ SD | 3 $\pm$ 33        | 4 $\pm$ 49        | 0.34    |
|                    | median (IQR)  | 0 (0-0)           | 0 (0-0)           |         |

Legend: The cumulative totals for each fluid type during the first 3 days following PICU admission. All volumes reported are in mL/kg.

**Supplementary Table 2: Daily Stages of AKI by Time Period**

| Stage of AKI | Day 1<br>n= 1831 |                | Day 2<br>n=1244 |                | Day 3<br>n=1008 |                | Day 4<br>n=839 |                | Day 5<br>n=737 |                | Day 6<br>n=653 |                | Day 7<br>n=552 |                |
|--------------|------------------|----------------|-----------------|----------------|-----------------|----------------|----------------|----------------|----------------|----------------|----------------|----------------|----------------|----------------|
|              | Pre              | Post           | Pre             | Post           | Pre             | Post           | Pre            | Post           | Pre            | Post           | Pre            | Post           | Pre            | Post           |
| 0            | 824<br>(87.7%)   | 772<br>(86.6%) | 542<br>(87.2%)  | 553<br>(88.6%) | 429<br>(86.7%)  | 449<br>(87.5%) | 351<br>(85.4%) | 380<br>(99.8%) | 316<br>(85.6%) | 323<br>(87.5%) | 275<br>(86.2%) | 292<br>(87.4%) | 239<br>(86.3%) | 236<br>(85.8%) |
| 1            | 60<br>(6.4%)     | 56<br>(6.3%)   | 40<br>(6.5%)    | 34<br>(5.5%)   | 32<br>(6.5%)    | 26<br>(5.1%)   | 28<br>(6.8%)   | 18<br>(4.2%)   | 28<br>(7.6%)   | 20<br>(5.4%)   | 24<br>(7.5%)   | 14<br>(4.2%)   | 19<br>(6.9%)   | 16<br>(5.8%)   |
| 2            | 26<br>(2.8%)     | 28<br>(3.1%)   | 18<br>(2.9%)    | 12<br>(1.9%)   | 18<br>(3.6%)    | 18<br>(3.5%)   | 17<br>(4.1%)   | 9<br>(2.1%)    | 9<br>(2.5%)    | 8<br>(2.2%)    | 7<br>(2.2%)    | 12<br>(3.6%)   | 7<br>(2.5%)    | 9<br>(3.3%)    |
| 3            | 30<br>(3.2%)     | 35<br>(3.9%)   | 20<br>(3.2%)    | 25<br>(4.0%)   | 16<br>(3.2%)    | 20<br>(3.9%)   | 15<br>(3.7%)   | 21<br>(4.9%)   | 15<br>(4.1%)   | 18<br>(4.9%)   | 13<br>(4.1%)   | 16<br>(4.8%)   | 12<br>(4.3%)   | 14<br>(5.1%)   |

**Supplementary Table 3: Daily Severe AKI by Time Period**

|                   | Day 1<br>n= 1831                          | Day 2<br>n=1244                            | Day 3<br>n=1008                            | Day 4<br>n=839                           | Day 5<br>n=737                             | Day 6<br>n=653                             | Day 7<br>n=552                            |
|-------------------|-------------------------------------------|--------------------------------------------|--------------------------------------------|------------------------------------------|--------------------------------------------|--------------------------------------------|-------------------------------------------|
| Pre-Intervention  | 56 (6%)<br>Ref                            | 38 (6.1%)<br>Ref                           | 34 (6.9%)<br>Ref                           | 32 (7.8%)<br>Ref                         | 24 (6.5%)<br>Ref                           | 20 (6.3%)<br>Ref                           | 19 (6.9%)<br>Ref                          |
| Post-Intervention | 63 (7.1%)<br>OR: 1.3<br>95% CI: 0.88-1.97 | 37 (5.9%)<br>OR: 1.03<br>95% CI: 0.63-1.69 | 38 (7.4%)<br>OR: 1.17<br>95% CI: 0.71-1.94 | 30 (7%)<br>OR: 0.92<br>95% CI: 0.53-1.59 | 26 (7.1%)<br>OR: 1.12<br>95% CI: 0.62-2.02 | 28 (8.4%)<br>OR: 1.45<br>95% CI: 0.79-2.67 | 23 (8.4%)<br>OR 1.31<br>95% CI: 0.69-2.52 |

**Supplementary Table 4:** Outcomes by Chloride Content of IV Resuscitation and Maintenance Fluids

| Outcomes                                  | Hypochloremic Fluid    | Normochloremic Fluid | Hyperchloremic Fluid   |
|-------------------------------------------|------------------------|----------------------|------------------------|
| <b>Acute Kidney Injury (Day 3) n=1008</b> |                        |                      |                        |
| n(%)                                      | 59 (34.3%)             | 18 (9%)              | 44 (7.8%)              |
| Unadjusted OR                             | 5.3 95% CI: 3.0-9.4    | Ref                  | 0.9 95% CI: 0.5-1.5    |
| Adjusted OR                               | 3.9 95% CI: 1.2-7.1    | Ref                  | 0.8 95% CI: 0.4-1.3    |
| <b>Mortality</b>                          |                        |                      |                        |
| n(%)                                      | 24 (9.1%)              | 17 (2.7%)            | 32 (2%)                |
| Unadjusted OR                             | 3.6 95% CI: 1.9-6.9    | Ref                  | 0.7 95% CI: 0.4-1.3    |
| Adjusted OR                               | 1.0 95% CI: 0.4-2.4    | Ref                  | 0.6 95% CI: 0.3-1.3    |
| <b>Need for Renal Replacement Therapy</b> |                        |                      |                        |
| n(%)                                      | 17 (6.4%)              | 6 (0.9%)             | 15 (0.9%)              |
| Unadjusted OR                             | 7.2 95% CI: 2.8-18.5   | Ref                  | 1.0 95% CI: 0.4-2.5    |
| Adjusted OR                               | 4.0 95% CI: 1.4-11.0   | Ref                  | 1.1 95% CI: 0.4-2.8    |
| <b>Hospital Length of Stay (days)</b>     |                        |                      |                        |
| Med (IQR)                                 | 8.1 (3.8-20.1)         | 4.9 (2.9-10.0)       | 5.1 (3-10)             |
| Unadjusted IRR                            | 1.7 95% CI: 1.6-1.8    | Ref                  | 0.94 95% CI: 0.91-0.96 |
| Adjusted IRR                              | 1.33 95% CI: 1.28-1.38 | Ref                  | 0.94 95% CI: 0.92-0.97 |
| <b>Ventilator Free Days</b>               |                        |                      |                        |
| Med (IQR)                                 | 28 (23-28)             | 28 (26-28)           | 28 (26-28)             |
| Unadjusted IRR                            | 0.95 95% CI: 0.92-0.98 | Ref                  | 1.02 95% CI: 1.01-1.04 |
| Adjusted IRR                              | 1.02 95% CI: 0.99-1.05 | Ref                  | 1.02 95% CI: 1.0-1.03  |
| <b>% Fluid Overload on Day 3 n=1008</b>   |                        |                      |                        |
| n(%)                                      | 82 (33.3%)             | 164 (29.7%)          | 326 (23.3%)            |
| Unadjusted OR                             | 1.19 95% CI: 0.86-1.64 | Ref                  | 0.72 95% CI: 0.58-0.90 |
| Adjusted OR                               | 1.30 95% CI: 0.91-1.86 | Ref                  | 0.73 95% CI: 0.58-0.92 |
| <b>Hyperchloremia</b>                     |                        |                      |                        |
| n(%)                                      | 50 (23.2%)             | 23 (7.1%)            | 111 (12.7%)            |
| Unadjusted RR                             | 3.26 95% CI: 2.05-5.18 | Ref                  | 2.79 95% CI: 1.74-4.50 |
| Adjusted RR                               | 1.78 95% CI: 1.16-2.74 | Ref                  | 1.84 95% CI: 1.20-2.82 |
| <b>Hypochloremia</b>                      |                        |                      |                        |

|               |                         |             |                        |
|---------------|-------------------------|-------------|------------------------|
| n(%)          | 35 (16.2%)              | 47 (14.5%)  | 82 (9.4%)              |
| Unadjusted RR | 1.11 95% CI: 0.75-1.67  | Ref         | 0.65 95% CI: 0.46-0.90 |
| Adjusted RR   | 1.09 95% CI: 0.71-1.66  | Ref         | 0.67 95% CI: 0.48-0.92 |
| Hyperkalemia  |                         |             |                        |
| n(%)          | 7 (3.2%)                | 1 (0.3%)    | 26 (3.0%)              |
| Unadjusted RR | 10.5 95% CI: 1.30-85.1  | Ref         | 9.67 95% CI: 1.31-71.0 |
| Adjusted RR   | 16.0 95% CI: 2.07-124.3 | Ref         | 9.94 95% CI: 1.35-73.4 |
| Hypokalemia   |                         |             |                        |
| n(%)          | 105 (48.2%)             | 169 (51.5%) | 346 (39.2%)            |
| Unadjusted RR | 0.93 95% CI: 0.79-1.11  | Ref         | 0.76 95% CI: 0.67-0.87 |
| Adjusted RR   | 0.81 95% CI: 0.68-0.97  | Ref         | 0.75 95% CI: 0.66-0.85 |

Legend: Chloride content of maintenance and resuscitation fluid was calculated through isolation of the fluid adjusted chloride loads from only maintenance and resuscitation sources. This content was then stratified into hypochloremic (<98 mmol/L), normochloremic (98-109 mmol/L), and hyperchloremic fluids (>109 mmol/L). AKI on day 3 is based on KDIGO creatinine definitions. Logistic regression analyses were used to evaluate the chloride content stratification using normochloremic fluids as reference and day 3 acute kidney injury, mortality and need for renal replacement therapy adjusting for age, PRISM III score, need for mechanical ventilation, and immunocompromised state. Poisson regression analyses were used to evaluate the chloride content stratification and length of stay and ventilator free days adjusting for the same confounding variables. Modified Poisson regression analyses were used to evaluate the relative risk for the development of the electrolyte abnormalities.

**Supplementary Table 5:** Electrolyte profiles and abnormalities in the first 7 days after admission.

| Electrolytes        | Pre-intervention | Post-intervention | p value |
|---------------------|------------------|-------------------|---------|
| <b>Weekly Mean</b>  |                  |                   |         |
| <b>Chloride</b>     |                  |                   |         |
| Hyperchloremia      | 119 (15.5%)      | 81 (10.4%)        | <0.0001 |
| Normochloremia      | 575 (75%)        | 587 (75%)         |         |
| Hypochloremia       | 73 (9.5%)        | 112 (14.4%)       |         |
| <b>Potassium</b>    |                  |                   |         |
| Hyperkalemia        | 25 (3.2%)        | 11 (1.4%)         | <0.0001 |
| Normokalemia        | 453 (58.5%)      | 407 (51.5%)       |         |
| Hypokalemia         | 296 (38.2%)      | 373 (47.2%)       |         |
| <b>Sodium</b>       |                  |                   |         |
| Hypernatremia       | 37 (4.7%)        | 36 (4.5%)         | 0.27    |
| Normonatremia       | 697 (88.6%)      | 689 (86.6%)       |         |
| Hyponatremia        | 53 (6.7%)        | 71 (8.9%)         |         |
| <b>Bicarbonate</b>  |                  |                   |         |
| Low/Acidosis        | 144 (18%)        | 144 (18.2%)       | 0.96    |
| Normal              | 553 (71.3%)      | 565 (71.5%)       |         |
| High/Alkalosis      | 83 (10.7%)       | 164 (10.5%)       |         |
| <b>On Admission</b> |                  |                   |         |
| <b>Chloride</b>     |                  |                   |         |
| Hyperchloremia      | 200 (21.3%)      | 80 (9%)           | <0.0001 |
| Normochloremia      | 687 (73.3%)      | 703 (76.9%)       |         |
| Hypochloremia       | 50 (5.3%)        | 80 (9%)           |         |
| <b>Potassium</b>    |                  |                   |         |
| Hyperkalemia        | 41 (4.4%)        | 38 (4.2%)         | <0.0001 |
| Normokalemia        | 500 (53%)        | 406 (44.4%)       |         |
| Hypokalemia         | 402 (42.6%)      | 470 (51.4%)       |         |
| <b>Sodium</b>       |                  |                   |         |
| Hypernatremia       | 47 (4.9%)        | 43 (4.7%)         | <0.0001 |

|                    |             |             |     |
|--------------------|-------------|-------------|-----|
| Normonatremia      | 796 (83.4%) | 703 (76.9%) |     |
| Hyponatremia       | 111 (11.6%) | 168 (18.4%) |     |
| <b>Bicarbonate</b> |             |             |     |
| Low/Acidosis       | 384 (40.6%) | 413 (45%)   | 0.1 |
| Normal             | 534 (56.5%) | 473 (51.6%) |     |
| High/Alkalosis     | 28 (3%)     | 31 (3.4%)   |     |

Legend: *Hypochloremia* was defined as <98mmol/L. *Normochloremia* was defined as 98-109mmol/L. *Hyperchloremia* was defined as >109mmol/L. *Hyponatremia* was defined as <136mmol/L. *Normonatremia* was defined as 136-149mmol/L. *Hypernatremia* was defined as >149mmol/L. *Hypokalemia* was defined as <3.9mmol/L. *Normokalemia* was defined as 3.9-5.7mmol/L. *Hyperkalemia* was defined as >5.7mmol/L. *Acidemia* was defined as <20mmol/L of bicarbonate. *Alkalemia* was defined as >30 mmol/L of bicarbonate.



Supplementary Figure 1: Daily Chloride for First 7 Days Dichotomized by Time Period

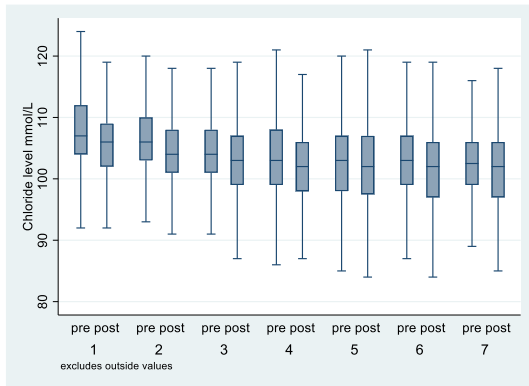

Legend: Reporting the median daily chloride levels for each patient.

Supplementary Figure 2: Daily Sodium for First 7 Days Dichotomized by Time Period

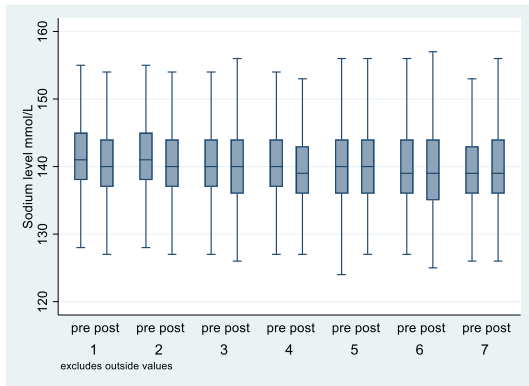

Legend: Reporting the median daily sodium levels for each patient.

Supplementary Figure 3: Daily Potassium for First 7 Days Dichotomized by Time Period

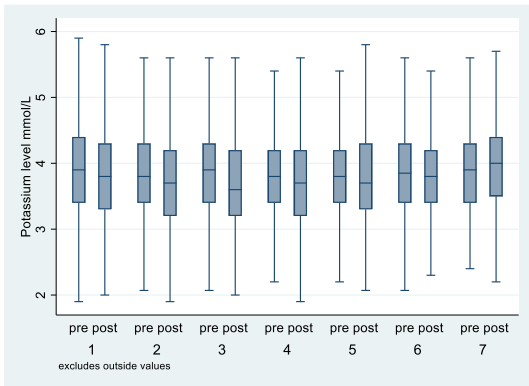

Legend: Reporting the median daily potassium levels for each patient.

Supplementary Figure 4: Daily Bicarbonate for First 7 Days Dichotomized by Time Period

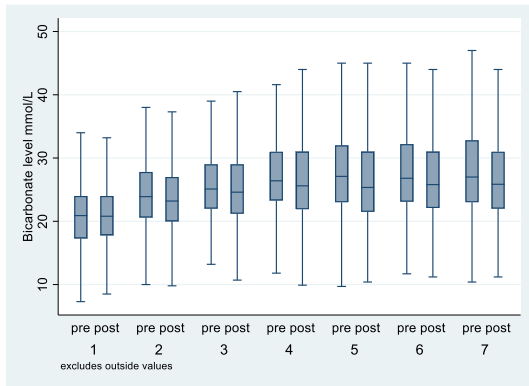

Legend: Reporting the median daily bicarbonate levels for each patient.

Supplementary Figure 5: Interrupted Time Series Day 3 AKI

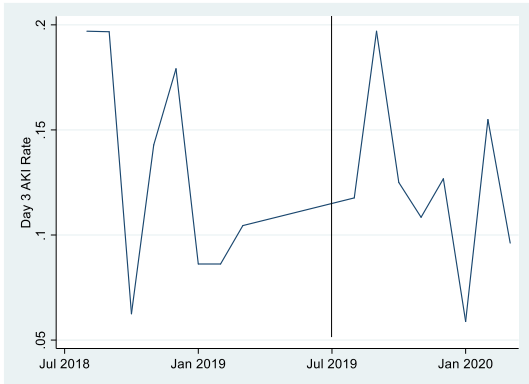

Legend: The monthly day 3 AKI rate is reported. The vertical line denotes the intervention.

Supplementary Figure 6: Interrupted Time Series Mortality

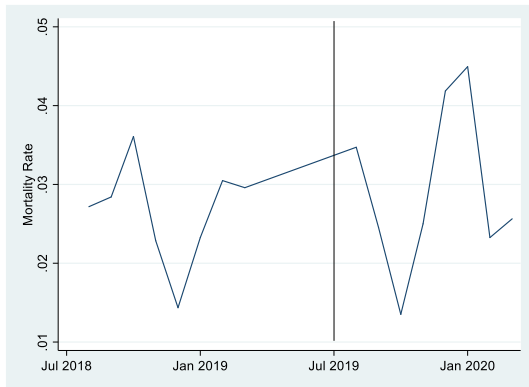

Legend: The monthly mortality rate is reported. The vertical line denotes the intervention.
